# Supplementary material
Source: PubMed Central journal article supplement (PMC1959523)
Supplement: biophysj_107.109439_1.pdf [file biophysj_107.109439_1.pdf]

## Supplemental Data

Figure S1

(A) Sample HPLC traces

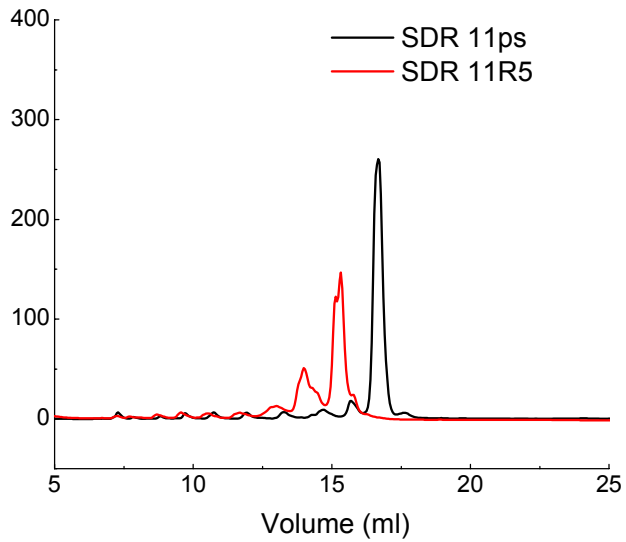

(B) A sample mass spectrometry trace

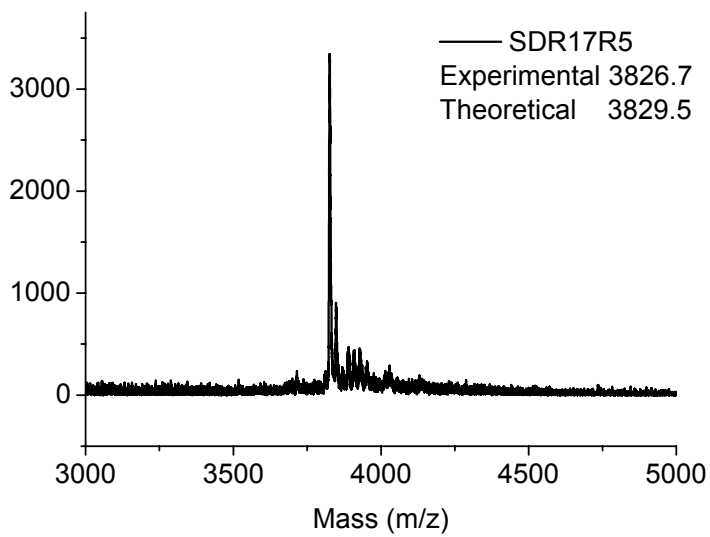

Table S1: Mean distances determined using measured  $P(r)$  from 20 – 70 Å.

| Nitroxide positions | $\langle r_{\text{DEER}} \rangle$ (Å) | $\langle r_{\text{model}} \rangle$ (Å) |
|---------------------|---------------------------------------|----------------------------------------|
| (9;17)              | 29.3                                  | 24.5                                   |
| (12;19)             | 29.6                                  | 31.1                                   |
| (9;23)              | 32.6                                  | 34.7                                   |
| (9;24)              | 35.3                                  | 38.8                                   |
| (11;23)             | 38.9                                  | 42.4                                   |
| (12;24)             | 44.8                                  | 46.6                                   |
| R.M.S.D. (Å)        | 3.1                                   |                                        |
| $R^2$               | 0.89                                  |                                        |

Table S2: Comparison between modeling with and without a fine search.

| Nitroxide positions     | $\langle r_{\text{DEER}} \rangle$ (Å) | NASNOX; + fine search <sup>(a)</sup> |                           | NASNOX; - fine search <sup>(a)</sup> |                           |
|-------------------------|---------------------------------------|--------------------------------------|---------------------------|--------------------------------------|---------------------------|
|                         |                                       | $\langle r \rangle$ (Å)              | Number of output distance | $\langle r \rangle$ (Å)              | Number of output distance |
| (9;17)                  | 25.2                                  | 24.5                                 | 18,315                    | 25.6                                 | 4,702                     |
| (12;19)                 | 28.1                                  | 31.1                                 | 19,879                    | 32.2                                 | 5,409                     |
| (9;23)                  | 32.7                                  | 34.7                                 | 19,503                    | 36.3                                 | 5,766                     |
| (9;24)                  | 37.9                                  | 38.8                                 | 20,493                    | 40.4                                 | 5,026                     |
| (11;23)                 | 40.5                                  | 42.4                                 | 20,607                    | 43.7                                 | 5,292                     |
| (12;24)                 | 47.2                                  | 46.6                                 | 21,321                    | 47.6                                 | 4,899                     |
| R.M.S.D. <sup>(b)</sup> | -----                                 | 1.7                                  | -----                     | 2.8                                  | -----                     |

(a) NASNOX modeling was carried using the step sizes described in the text.

(b) Root mean square deviation between measured ( $\langle r_{\text{DEER}} \rangle$ ) and modeled ( $\langle r \rangle$ ) average distances.
